# Supplementary material for: Bottom RedOx Model (BROM v.1.1): a coupled benthic–pelagic model for simulation of water and sediment biogeochemistry
Source: Copernicus journal article supplement (doi:10.5194/gmd-10-453-2017), 2017-02-01
Supplement: Supplementary file 1 [file gmd-10-453-2017-supplement.pdf]

Supplement of Geosci. Model Dev., 10, 453–482, 2017  
<http://www.geosci-model-dev.net/10/453/2017/>  
doi:10.5194/gmd-10-453-2017-supplement  
© Author(s) 2017. CC Attribution 3.0 License.

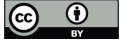

*Supplement of*

## **Bottom RedOx Model (BROM v.1.1): a coupled benthic–pelagic model for simulation of water and sediment biogeochemistry**

**Evgeniy V. Yakushev et al.**

*Correspondence to:* Evgeniy V. Yakushev (evgeniy.yakushev@niva.no)

The copyright of individual parts of the supplement might differ from the CC-BY 3.0 licence.

## Section S1: run-time input file for BROM-transport (brom.yaml)

# IMPORTANT !!!! \_ <TAB> is NOT allowed here, used <Space> only !!!!

# Each entry must have 6 spaces before the parameter name

instances:

brom:

initialization:

##--Paramters for grid----- (see io\_ascii.f90/make\_vert\_grid for a grid diagram)-----

water\_layer\_thickness: 95. # Thickness of the water column [m] (may overridden by netCDF input, see below)

k\_wat\_bbl: 18 # Number of levels above the water/BBL boundary (may be overridden by netCDF input, see below)

bbl\_thickness: 0.5 # Thickness of the high-resolution layer overlying the sediments (model "benthic boundary layer") [m] (default = 0.5 m)

# This should be thinner than the full viscous+logarithmic layer, but thicker than the viscous layer

# Typical thicknesses for full viscous+logarithmic layer are 1 m and 10 m for deep sea and shelf respectively (Wimbush 2012)

hz\_bbl\_min: 0.02 # Minimum allowed layer thickness in the BBL near the SWI [m] (default = 0.02 m)

hz\_sed\_min: 0.0005 # Minimum layer thickness in the sediments near the SWI [m] (default = 0.0005 m)

hz\_sed\_max: 0.01 # Maximum layer thickness deeper in the sediments [m] (default = 0.01 m)

k\_min: 1 # Minimum k number defining the layer that is in contact with the atmosphere (default = 1)

k\_points\_below\_water: 17 # Number of levels below the water/BBL boundary (default = 20)

i\_min: 1 # Minimum i number (default = 1)

i\_water: 1 # Number of i for water column (default = 1)

i\_max: 1 # Maximum i number (default = 1)

#Note: (i\_min,i\_water,i\_max) should be (1,1,1) for 1D applications

#

#

##--Boundary conditions-----

#

#Here we set the type of boundary condition using bctype\_top\_<variable name> and bctype\_bottom\_<variable name>

# 0 to use surface fluxes from FABM where parameterized, otherwise no flux (default, does not need to be explicitly set)

# 1 for constant Dirichlet, specified by bc\_top\_<variable name> or bc\_bottom\_<variable name>

# E.g. bctype\_bottom\_niva\_brom\_bio\_O2: 1

# bc\_bottom\_niva\_brom\_bio\_O2: 0.

# 2 for sinusoidal Dirichlet, specified by bcpair\_top\_<variable name> or bcpair\_bottom\_<variable name>

# The model is:  $\phi(t) = a_1 + a_2 \sin(\omega \cdot (\text{day} - a_3))$  where  $\omega = 2\pi/365$

#  $\Rightarrow \max(\phi(t)) = a_1 + a_2$ ,  $\min(\phi(t)) = a_1 - a_2$ ,  $\text{mean}(\phi(t)) = a_1$ , peak at  $91.25 + a_3$  days

# Model parameters are specified by a1top\_<variable name> etc.

# E.g. bctype\_top\_niva\_brom\_bio\_NO3: 2

# a1top\_niva\_brom\_bio\_NO3: 3.0

# a2top\_niva\_brom\_bio\_NO3: 3.0

# a3top\_niva\_brom\_bio\_NO3: 60.

# 3 for arbitrary Dirichlet, read from netCDF file (see I/O options to specify netCDF variable names)

#

# bctype\_bottom\_niva\_brom\_bio\_O2: 1

# bc\_bottom\_niva\_brom\_bio\_O2: 0.

#

bctype\_top\_niva\_brom\_redox\_SO4: 1

bc\_top\_niva\_brom\_redox\_SO4: 25000.

bctype\_bottom\_niva\_brom\_redox\_SO4: 1

bc\_bottom\_niva\_brom\_redox\_SO4: 25000.

#

bctype\_top\_niva\_brom\_redox\_Mn4: 1

bc\_top\_niva\_brom\_redox\_Mn4: 20.E-4

#

bctype\_top\_niva\_brom\_redox\_Fe3: 1

bc\_top\_niva\_brom\_redox\_Fe3: 5.E-4

#

bctype\_top\_niva\_brom\_carb\_Alk: 1

bc\_top\_niva\_brom\_carb\_Alk: 2200.

# bctype\_bottom\_niva\_brom\_carb\_Alk: 1

# bc\_bottom\_niva\_brom\_carb\_Alk: 3200.

#

# bctype\_bottom\_niva\_brom\_carb\_DIC: 1

# bc\_bottom\_niva\_brom\_carb\_DIC: 2850.

#

# bctype\_bottom\_niva\_brom\_bio\_NH4: 1

# bc\_bottom\_niva\_brom\_bio\_NH4: 10.

#

bctype\_top\_niva\_brom\_bio\_NO3: 2

a1top\_niva\_brom\_bio\_NO3: 1. # 3

a2top\_niva\_brom\_bio\_NO3: 1.

a3top\_niva\_brom\_bio\_NO3: 320.

bctype\_bottom\_niva\_brom\_bio\_NO3: 1

```

bc_bottom_niva_brom_bio_NO3: 0.
#
bctype_top_niva_brom_bio_PO4: 2
a1top_niva_brom_bio_PO4: 0.7 #0.8
a2top_niva_brom_bio_PO4: 0.7
a3top_niva_brom_bio_PO4: 320. #60.
# bctype_bottom_niva_brom_bio_PO4: 1
# bc_bottom_niva_brom_bio_PO4: 10.
#
bctype_top_niva_brom_redox_Si: 2
a1top_niva_brom_redox_Si: 1.5
a2top_niva_brom_redox_Si: 1.5
a3top_niva_brom_redox_Si: 320.
# bctype_bottom_niva_brom_redox_Si: 1
# bc_bottom_niva_brom_redox_Si: 100.
#
#
##---Horizontal mixing parameters-----
#
#Here we specify horizontal mixing model using hmix_<variable name>
# 0 to assume no horizontal mixing (default, does not need to be explicitly set)
# 1 for "box model" mixing model: hmix = hmix_rate*(X_0 - X) with X_0 specified by netCDF input file and hmix_rate specified here
#
hmix_niva_brom_bio_NO3: 0
hmix_niva_brom_bio_NH4: 0
hmix_niva_brom_bio_PO4: 0
hmix_niva_brom_redox_Si: 0
hmix_niva_brom_bio_O2: 0
#
#
##---Ice model parameters-----
use_hice: 0 # 1 to use ice thickness forcing "hice" from netCDF input
#
#
##---Constant forcings-----
density: 1000.
wind_speed: 8. # Wind speed 10 m above sea surface [m/s] (default = 8 m/s)
pco2_atm: 380. # Atmospheric partial pressure of CO2 [ppm] (default = 380 ppm)
#
#
##---Surface irradiance model parameters-----
use_Eair: 0 # 1 to use 24-hr average surface downwelling shortwave irradiance in air from netCDF input
lat_light: 50 # Latitude of modelled site [degrees north], e.g. Hardangerfjord station H6 is at 60.228N; Sleipner=50N; Saelen=60.33N
lo: 80. # Theoretical maximum 24-hr average surface downwelling shortwave irradiance in air [W/m2] (default = 80 W/m2)
# This should include that effect of average cloud cover (local)
light_model: 0 # Specify light model: 0 for simple model based on ersem/light.f90
# 1 for extended model accounting for other particulates in BROM
#
#
##---Light absorption model parameters-----
Eair_to_PAR0: 0.5 # Factor to convert input or calculated surface downward irradiance Eair to surface PAR in water (default = 0.5, units dependent on Eair)
# Factor of ~0.48 to convert shortwave (0.3-4 um) to PAR-band (0.4-0.7 um) in [W/m2]
# Further factor of 0.8-0.95 to convert downward-in-air to net-in-water (Mobley and Boss, 2012, Figs. 2c, 4b, 8a)
# Latter factor becomes 0.45-0.55 if modelling PAR in terms of photon flux (Mobley and Boss, 2012, Figs. 5b, 8b)
k0r: 0.04 # Background PAR attenuation [m-1] (default = 0.04 m-1, from ERSEM shortwave attenuation default)
kESS: 4e-05 # Specific PAR attenuation by silt [m^2/mg] (default = 4e-05 m^2/mg, from ERSEM shortwave attenuation default)
ESS: 0. # Assumed (constant) concentration of silt [mg/m^3] (default = 0. mg/m^3, from ERSEM shortwave attenuation default)
kPhy: 0.00023 # Specific PAR attenuation by phytoplankton [m^2/mg N] (default = 0.0023 m^2/mg N, from ERSEM shortwave attenuation default)
# From ERSEM Blackford (P1-P4), default = 0.0004 m^2/mg C * 5.68 mg C/mg N (Redfield ratio 106/16 mol/mol)
# Note misprint "e-3" instead of "e-4" in Blackford et al. (2004) Table 1
kPON: 0. # Specific PAR attenuation due to PON [m^2/mg N] (default = 0. m^2/mg N)
# The following are only used if light_model = 1
kHet: 0. # Specific PAR attenuation due to zooplankton [m^2/mg N] (default = 0. m^2/mg N)
kDON: 0. # Specific PAR attenuation due to DON [m^2/mg N] (default = 0. m^2/mg N)
kB: 0. # Specific PAR attenuation due to bacteria [m^2/mg N] (default = 0. m^2/mg N)
kPIV: 0. # Specific PAR attenuation due to total particulate inorganic volume fraction (default = 0. m^-1)
#
#
##---Assumed densities for particles in the model (may be used in light/sedimentation models)-----
#
# Densities are specified by rho_<full variable name> and in same units as the model concentration
# Any missing values will use the default density rho_def
rho_def: 3.0E7 # Default density of solid particles [mmol/m3]
rho_niva_brom_bio_Phy: 1.5E7 # Density of (living) phytoplankton [mmolN/m3] (default = 1.4E6 mmolN/m3 from PON default)

```

```

rho_niva_brom_bio_PON: 1.5E7 # Density of (dead) particulate organic matter [mmolN/m3] (default = 1.4E6 mmolN/m3, from: 1.23 g WW/cm3
(Alldredge, Gotschalk, 1988), mg DW/mg WW=0.18 and mg DW /mg C=2 (Link et al.,2006))
rho_niva_brom_bio_Het: 1.5E7 # Density of (living) non-bacterial heterotrophs [mmolN/m3] (default = 1.4E6 mmolN/m3 from PON default)
rho_niva_brom_redox_Baae: 1.5E7 # Density of (living) aerobic autotrophic bacteria [mmolN/m3] (default = 1.4E6 mmolN/m3 from PON default)
rho_niva_brom_redox_Bhae: 1.5E7 # Density of (living) aerobic heterotrophic bacteria [mmolN/m3] (default = 1.4E6 mmolN/m3 from PON default)
rho_niva_brom_redox_Baan: 1.5E7 # Density of (living) anaerobic autotrophic bacteria [mmolN/m3] (default = 1.4E6 mmolN/m3 from PON default)
rho_niva_brom_redox_Bhan: 1.5E7 # Density of (living) anaerobic heterotrophic bacteria [mmolN/m3] (default = 1.4E6 mmolN/m3 from PON default)
rho_niva_brom_redox_CaCO3: 2.80E7 # Density of calcium carbonate [mmolCa/m3] (default = 2.80E7 mmolCa/m3)
rho_niva_brom_redox_Fe3: 3.27E7 # Density of Fe3 [mmolFe/m3] (default = 3.27E7 mmolFe/m3)
rho_niva_brom_redox_FeCO3: 2.93E7 # Density of FeCO3 [mmolFe/m3] (default = 2.93E7 mmolFe/m3)
rho_niva_brom_redox_FeS: 5.90E7 # Density of FeS [mmolFe/m3] (default = 5.90E7 mmolFe/m3)
rho_niva_brom_redox_FeS2: 4.17E7 # Density of FeS2 [mmolFe/m3] (default = 4.17E7 mmolFe/m3)
rho_niva_brom_redox_Mn4: 5.78E7 # Density of Mn4 [mmolMn/m3] (default = 5.78E7 mmolMn/m3)
rho_niva_brom_redox_MnCO3: 3.20E7 # Density of MnCO3 [mmolMn/m3] (default = 3.20E7 mmolMn/m3)
rho_niva_brom_redox_MnS: 4.60E7 # Density of MnS [mmolMn/m3] (default = 4.60E7 mmolMn/m3)
rho_niva_brom_redox_S0: 6.56E7 # Density of S0 [mmolS/m3] (default = 6.56E7 mmolS/m3)
rho_niva_brom_redox_Sipart: 4.40E7 # Density of particulate silicate [mmolSi/m3] (default = 4.40E7 mmolSi/m3)
#
#
##--Time stepping parameters-----
dt: 0.0025 # Time step in [days] (default = 0.0025 days)
freq_turb: 1 # Physical mixing time step = dt/freq_turb (default = 1)
freq_sed: 1 # Sinking / bhc frequency (default = 1)
year: 1998 # Selected year (for reading netCDF inputs) WARNING: This must be a year present in the netCDF file, and nc_year0 must be correctly
specified below
days_in_yr: 365 # Number of days in repeated period (typically 365 or 366, default = 365)
last_day: 3650 # Last day in simulation (~ days_in_yr * no. repeated years, default = 365)
cc0: 1.0E-11 # Resilient (minimum) concentration for all variables [mmol/m3] (default = 1.0E-11 mmol/m3)
surf_flux_with_diff: 0 # 1 to include surface fluxes in diffusion update, 0 to include in biogeochemical update (default = 0)
#
#
##--Vertical diffusivity parameters-----
diff_method: 1 # Numerical method to treat vertical diffusion (default = 1):
# 0 for FTCS approach (Forward-Time Central-Space scheme)
# 1 for GOTM approach (semi-implicit in time) using diff_center from GOTM lake (converting input/output units)
# 2 for GOTM approach (semi-implicit in time) using modified version of original GOTM diff_center (no units conversion required, should
give very similar results to diff_method = 1)
# Note: If diff_method>0 and bioturb_across_SWI = 1 below, only one modified GOTM subroutine can be used (diff_center2)
cnpar: 0.6 # "Implicitness" parameter for GOTM vertical diffusion (default = 0.6):
# 0 => Forward Euler (fully explicit, first-order accurate)
# 1 => Backward Euler (fully implicit, first-order accurate)
# 0.5 => Crank-Nicolson (semi-implicit, second-order accurate)
dynamic_kz_bbl: 0 # 1 for dynamic (time-dependent) kz_bbl, 0 for static kz_bbl (default = 0)
# For deep water (e.g. >500 m) a static kz_bbl may be a reasonable approximation.
# For shallower water, probably better to set dynamic_kz_bbl = 1; kz in the BBL is then determined by linearly interpolating between zero at
the SWI and the value at the bottom of the hydrodynamic model input water column
kz_bbl_type: 1 # Type of variation of eddy diffusion kz(z) assumed over the benthic boundary layer:
# 0 => constant = kz_bbl_max, 1 => linear (~=> log-layer for velocity, Holtappels & Lorke, 2011)
# This is only used if assuming a static kz_bbl (dynamic_kz_bbl = 0)
kz_bbl_max: 5.E-6 # Maximum eddy diffusivity in the benthic boundary layer [m2/s] (default = 1.0E-5 m2/s)
# This is only used if assuming a static kz_bbl (dynamic_kz_bbl = 0)
dbl_thickness: 0.0005 # Thickness of the diffusive boundary layer [m] (default = 0.0005 m = 0.5 mm)
# Jorgensen and Revsbech (1985) quote a range 1-2 mm over the deep sea floor (Boudreau and Guinasso, 1982, Wimbush 1976)
# and down to 0.1-0.2 mm over more exposed sediments (Santschi et al., 1983)
# All layers within the DBL (midpoint height above SWI < dbl_thickness) have kz = kz_mol0 (no eddy diffusivity)
kz_mol0: 1.0E-9 # Molecular diffusivity at infinite dilution [m2/s] (default = 1.0E-9 m2/s)
# Cf. range (0.5-2.7)E-9 m2/s in Boudreau 1997, Table 4.8
# This sets a single constant value for all variables that is subsequently corrected for viscosity and tortuosity
mu0_musw: 0.94 # Inverse relative viscosity of saline pore water (default = 0.94 from Boudreau 1997 Table 4.10)
# This relates the diffusivity in saline pore water to the infinite-dilution diffusivity
# assuming the approximation from Li and Gregory (1974), see Boudreau (1997) equation 4.107
kz_bioturb_max: 1.0E-11 # Maximum diffusivity due to bioturbation in the sediments [m2/s] (default = 1.0E-11 m2/s)
# Cf. range (1-100) cm2/yr = (0.3-30)E-11 m2/s cited in Soetaert and Middelburg (2009), citing Middelburg et al. (1997)
# This sets value for upper z_const_bioturb metres, then bioturbation diffusivity decays with scale z_decay_bioturb.
z_const_bioturb: 0.01 # "Mixed layer depth" in sediments over which bioturbation diffusivity = kz_bioturb_max [m] (default = 0.02 m)
# Cf. values 0.05 m and 0.01 m used by Soetaert and Middelburg (2009) for well-mixed and anoxic conditions respectively
# Meire et al. (2013) use 0.05 m as a constant value
z_decay_bioturb: 0.01 # Decay scale of bioturbation diffusivity below z_const_bioturb [m] (default = 0.01 m, following Soetaert and Middelburg, 2009)
K_O2s: 5.0 # Half-saturation constant for the effect of oxygen on bioturbation and bioirrigation [uM] (default = 5.0 uM)
# Bioturbation diffusivity and bioirrigation rate are modulated by a Michaelis-Menten function with parameter K_O2s
bioturb_across_SWI: 1 # 1 to allow (interphase) bioturbation diffusion across the SWI (default = 1)
# Bioturbation across the SWI must be interphase mixing rather than the intraphase mixing assumed within the sediments
#
#

```

```

##--Bioirrigation parameters-----
#
# Bioirrigation rate alpha = a1_bioirr*exp(-a2_bioirr*z_s), where z_s is depth below the SWI [m]
#
a1_bioirr: 0.0 # Maximum rate of bioirrigation in the sediments [s^-1] (default = 0.E-5)
# Schluter et al. (2000) infer a range (0-5) d^-1 = (0-6)E-5 s^-1 for a1
# This range is also broadly consistent with the profiles of alpha inferred by Miele et al. (2001)
a2_bioirr: 50. # Decay rate with depth of bioirrigation rate [m^-1] (default = 50)
# Schluter et al. (2000) infer a range (0-1) cm^-1 = (0-100) m^-1 for a2
# This range is also broadly consistent with the profiles of alpha inferred by Miele et al. (2001)
#
#
##--Sedimentation parameters-----
w_binf: 1.0E-10 # Particulate background burial velocity deep in the sediments where phi = phi_inf [m/s] (default = 1.0E-10 m/s = 0.3 cm/year, but note
that true values are highly variable)
# Soetaert et al. (1996) propose a regression model as a function of water depth:
# w = 982*D^-1.548, where D is water depth in [m] and w is in cm/year, e.g. for D = 100 m, w = 0.8 cm/year = 2.5E-10 m/s
# Note: Shallow particulate and solute burial velocities are inferred by assuming steady state compaction (Boudreau, 1997)
dynamic_w_sed: 1 # 1 to enable time-dependent advective velocities in the sediments (default = 0)
# This uses the modelled (reactive) particulate variables to correct the advective velocities in the sediments (see calculate_sed)
# w_binf and phi_inf then define constant background components of these velocities
#
#
##--Porosity parameters-----
#
# Porosity phi = phi_inf + (phi_0-phi_inf)*exp(-z_s/z_decay_phi), where z_s is depth below the SWI [m]
#
phi_0: 0.95 # Maximum porosity at the SWI (default = 0.95, following Soetaert et al., 1996)
phi_inf: 0.80 # Minimum porosity deep in the sediments (default = 0.80, following Soetaert et al., 1996)
z_decay_phi: 0.04 # Exponential decay scale for excess porosity in the upper sediments [m] (default = 0.04, following Soetaert et al., 1996)
#
#
##--I/O options-----
input_type: 2 # input forcing type: 0 for sinusoidal changes, 1 to read from ascii, 2 to read from netCDF (default)
ncoutfile_name: BROM_Sleipner_out20.nc # netCDF output file name
outfile_name: finish.dat # ascii output file name
port_initial_state: 1 # 0 to use FABM default (default), 1 to read from ascii file (icfile_name)
icfile_name: start19.dat # ascii initial condition file name (needed if port_initial_state = 1)
#The following are only used if reading input from netCDF (input_type = 2)
#Note: NetCDF variables (temperature, salinity, diffusivity) must have either two dimensions (depth, time) or four dimensions ((latitude, longitude, depth, time)
or (longitude, latitude, depth, time))
nc_set_k_wat_bbl: 1 # 1 (default) to set the no. water column layers to agree with netCDF input
# 0 to use the value k_wat_bbl set above by subsampling the netCDF input
# Note that in both cases the water layer thickness is determined by the netCDF input, overriding water_layer_thickness above
nc_staggered_grid: 1 # 1 (default) to assume a staggered input grid, (t,s) at layer midpoints, kz on layer interfaces (e.g. ROMS, GOTM)
nc_bottom_to_top: 1 # 1 (default) if netCDF variables are stored with vertical index increasing from bottom to top (e.g. ROMS, GOTM)
nc_z_increasing_upward: 1 # 1 if netCDF depth variables are increasing upward (e.g. if "depth" is negative) (default = 0)
ncinfile_name: nns_annual.nc # netCDF input file name
ncintime_name: time # netCDF time dimension name [units since nc_year0-01-01 00:00:00]
nc_year0: 1998 # reference year for netCDF time variable (default = 1970) WARNING: This MUST be correctly specified
ncinz_name: z # netCDF depth dimension name for layer midpoints (rho points) [m]
ncinz2_name: z1 # netCDF depth dimension name for layer interfaces (w points) [m]
ncinlat_name: lat # netCDF latitude dimension name (needed if reading 4D variables)
ncinlon_name: lon # netCDF longitude dimension name (needed if reading 4D variables)
ncinlat_sel: 1 # Chosen latitude index (1,2,...,nlat) (needed if reading from 4D variables with nlat > 1)
ncinlon_sel: 1 # Chosen longitude index (1,2,...,nlon) (needed if reading from 4D variables with nlon > 1)
#
#Below we specify the names of variables in netCDF input files
#Format is <BROM internal name>: <netCDF input name>
#Can also specify a constant scale factor "fac", e.g. to convert units, or correct bias.
#BROM internal variable = fac * netCDF input variable (BROM assumes fac = 1 if not specified here)
#This factor can also be used to apply a simple stoichiometric assumption in lieu of nutrient variable data
#E.g. ncinSis_name: NO3s # netCDF input surface silicate variable name [uM] - here using nitrate
# ncinSis_fac: 1.5 # scale factor for netCDF input surface silicate - here assuming "extended Redfield ratio" Si:N = 1.5 mol Si / mol N
#
#2D physical variables used for setting BROM forcings
#These must be arrays of size [no. water column layers (= k_wat_bbl) * no. of days for all available years]
ncint_name: temp # netCDF input temperature variable name [degC]
ncins_name: salt # netCDF input salinity variable name [psu]
ncinkz_name: nus # netCDF input vertical diffusivity variable name [m2/s]
ncinkz_fac: 1.0 # scale factor for netCDF input vertical diffusivity (default = 1.0)
#
#1D physical variables used for setting BROM forcings
#These must be arrays of size [no. of days for all available years]

```

```

ncinEair_name: Eair          # netCDF input shortwave irradiance in air at water surface [W/m2] (only used if use_Eair = 1)
ncinEair_fac: 1.0          # scale factor for netCDF input shortwave irradiance (default = 1.0) (only used if use_Eair = 1)
ncinhice_name: hice        # netCDF input ice thickness variable name [m] (only used if use_hice = 1)
ncinhice_fac: 1.0         # scale factor for netCDF input ice thickness (default = 1.0) (only used if use_hice = 1)
#
#Biogeochemical variables used for setting Dirichlet BCs at surface or bottom (bctype = 3)
#These must be arrays of size [1 * no. of days in repeated period (= days_in_yr)]
ncinNH4s_name: NH4s        # netCDF input surface ammonium variable name [uM]
ncinNH4s_fac: 1.0         # scale factor for netCDF input surface ammonium (default = 1.0)
ncinNO3s_name: NO3s        # netCDF input surface nitrate variable name [uM]
ncinNO3s_fac: 1.0         # scale factor for netCDF input surface nitrate (default = 1.0)
ncinPO4s_name: PO4s        # netCDF input surface phosphate variable name [uM]
ncinPO4s_fac: 1.0         # scale factor for netCDF input surface phosphate (default = 1.0)
ncinSis_name: Sis          # netCDF input surface silicate variable name [uM]
ncinSis_fac: 1.0          # scale factor for netCDF input surface silicate (default = 1.0)
ncinAlks_name: ATs         # netCDF input surface alkalinity variable name [uM]
ncinAlks_fac: 1.0         # scale factor for netCDF input surface alkalinity (default = 1.0)
#
#Biogeochemical variables used for setting horizontal mixing fluxes
#NOTE: These must be arrays of size [no. water column layers (= k_wat_bbl) * no. of days in repeated period (= days_in_yr)]
#NOTE: The depth indexing must agree with temperature and salinity inputs
#NOTE: The layer index of the mixing variable is the layer with which it mixes in the internal BROM grid
# This is does not necessarily reflect the actual depth of the mixing variable in its external location
#NOTE: This information is only used if hmix_<variable name> is > 0, see above
ncinNH4hmix_name: NH4_N    # netCDF input horizontal mixing ammonium variable name [uM]
ncinNH4hmix_fac: 1.0      # scale factor for netCDF input horizontal mixing ammonium (default = 1.0)
ncinNO3hmix_name: NO3_N   # netCDF input horizontal mixing nitrate variable name [uM]
ncinNO3hmix_fac: 1.0     # scale factor for netCDF input horizontal mixing nitrate (default = 1.0)
ncinPO4hmix_name: PO4_N   # netCDF input horizontal mixing phosphate variable name [uM]
ncinPO4s_fac: 1.0        # scale factor for netCDF input horizontal mixing phosphate (default = 1.0)
ncinSihmix_name: NO3_N    # netCDF input horizontal mixing silicate variable name [uM]
ncinSihmix_fac: 1.5      # scale factor for netCDF input horizontal mixing silicate (default = 1.0)
ncinO2hmix_name: O2_N     # netCDF input horizontal mixing oxygen variable name [uM]
ncinO2hmix_fac: 1.0      # scale factor for netCDF input horizontal mixing oxygen (default = 1.0)
#
#Horizontal mixing rates
#NOTE: This must be an array of size [no. water column layers (= k_wat_bbl) * no. of days in repeated period (= days_in_yr)]
#NOTE: The depth indexing must agree with temperature and salinity inputs
#NOTE: This information is only used if hmix_<variable name> is > 0, see above
ncinhmix_rate_name: hmix_rate # netCDF input horizontal mixing rates [day^-1]
ncinhmix_rate_fac: 1.0       # scale factor for netCDF input horizontal mixing rate (default = 1.0)
#
#
##--Options for run-time output to screen-----
show_maxmin: 0              # 1 to show the profile maximum and minimum of each variable at the end of each day (default = 0)
show_kztCFL: 0             # 1/2 to show the max/profile of total vertical diffusivity and associated Courant-Friedrichs-Lewy number at the end of
each day (default = 0)
show_wCFL: 0               # 1/2 to show the max/profile of vertical advection and associated Courant-Friedrichs-Lewy number at the end of each day
(default = 0)
show_nan: 0                # 1 to show the profile concentration output on NaN-termination for the offending variable (default = 1)
show_nan_kztCFL: 2         # 1/2 to show the max/profile of total vertical diffusivity and associated Courant-Friedrichs-Lewy number on NaN-
termination (default = 1)
show_nan_wCFL: 1           # 1/2 to show the max/profile of vertical advection and associated Courant-Friedrichs-Lewy number on NaN-termination
(default = 1)
#
#
## References
# Boudreau B.P., 1997. Diagenetic Models and Their Implementation, Springer-Verlag, Berlin.
# Holzbecher, E., 2002. Advective flow in sediments under the influence of compaction. Hydrological Sciences 47(4), 641-649.
# Link JS, Griswold CA, Methratta ET, Gunnard J, Editors. 2006. Documentation for the Energy Modeling and Analysis eXercise (EMAX). US Dep. Commer.,
Northeast Fish. Sci. Cent. Ref. Doc. 06-15; 166 p.
# Meile, C., Koretsky, C.M., Cappellen, P.V., 2001. Quantifying bioirrigation in aquatic sediments: An inverse modeling approach. Limnol. Oceanogr. 46(1), 164-
177.
# Meire, L., Soetaert, K.E.R., Meysman, F.J.R, 2013. Impact of global change on coastal oxygen dynamics and risk of hypoxia. Biogeosciences 10, 2633-2653.
# Mobley, C.D., Boss, E.S., 2012. Improved irradiances for use in ocean heating, primary production, and photo-oxidation calculations. Applied Optics 51(27),
6549-6560.
# Schluter, M., Sauter, E., Hansen, H., Suess, E., 2000. Seasonal variations of bioirrigation in coastal sediments: Modelling of field data. Geochimica et
Cosmochimica Acta 64(5), 821-834.
# Soetaert, K., Herman, P.M.J., Middelburg, J.J., 1996. A model of early diagenetic processes from the shelf to abyssal depths. Geochimica et Cosmochimica
Acta 60(6), 1019-1040.
# Soetaert, K., Middelburg, J.J., 2009. Modeling eutrophication and oligotrophication of shallow-water marine systems: the importance of sediments under
stratified and well-mixed conditions. Hydrobiologia 629:239-254.
# Wimbush, M., 2012: The Physics of The Benthic Boundary Layer, in The Benthic Boundary Layer, edited by I. McCave.

```

## Section S2: run-time input file for BROM-biogeochemistry (fabm.yaml)

```
# IMPORTANT !!!! _ <TAB> is NOT allowed here, used <Space> only !!!!
# Each entry must have 6 spaces before the parameter name
require_initialization: true
instances:
#-----
  niva_brom_eqconst:
#-----
  niva_brom_carb:
  initialization:
    Alk: 2200.
    DIC: 2100.
  coupling:
    Kc0: niva_brom_eqconst/Kc0
    Kc1: niva_brom_eqconst/Kc1
    Kc2: niva_brom_eqconst/Kc2
    Kw: niva_brom_eqconst/Kw
    Kb: niva_brom_eqconst/Kb
    Kp1: niva_brom_eqconst/Kp1
    Kp2: niva_brom_eqconst/Kp2
    Kp3: niva_brom_eqconst/Kp3
    Knh4: niva_brom_eqconst/Knh4
    Kh2s: niva_brom_eqconst/Kh2s
#   Kh2s2: niva_brom_eqconst/Kh2s2
    KSi: niva_brom_eqconst/KSi
    kso4: niva_brom_eqconst/kso4
    kflu: niva_brom_eqconst/kflu
    tot_free: niva_brom_eqconst/tot_free
# Constants calculated: Kc0 (Weiss, 1974), Kc1, Kc2 (Roy et al., 1993), Kw, Kp1,Kp2,Kp3 (DOE, 2004),
#                   Kb (Dickson,1990), KSi(Millero,1995), Knh4, Kh2s1(Luff et al, 2001), Kh2s2(Volkov 1984)
#                   dissociation for B, F according to (Dickson et al., 2007), more references in the code.
    PO4: niva_brom_bio/PO4
    NH4: niva_brom_bio/NH4
    DON: niva_brom_bio/DON
    Si: niva_brom_redox/Si
    H2S: niva_brom_redox/H2S
    Mn3: niva_brom_redox/Mn3
    Mn4: niva_brom_redox/Mn4
    Fe3: niva_brom_redox/Fe3
    SO4: niva_brom_redox/SO4
#-----
  niva_brom_bio:
  initialization:
    O2: 200.
    Phy: 0.01
    Het: 0.01
    PON: 0.01
    DON: 0.0
    NO3: 5.
    PO4: 1.
    NH4: 0.0
  parameters:
# --- Phy -----
    K_phy_gro: 4.7 # Maximum specific growth rate (1/d) =0.9-1.3 (Savchuk, 2002), =3.(Gregoire, Lacroix, 2001) >10.5 worked for Berrel<
    lopt: 25. # Optimal irradiance (W/m2) =50 (Savchuk, 2002)
    bm: 0.12 # Coefficient for growth dependence on t
    cm: 1.4 # Coefficient for growth dependence on t
    K_phy_mrt: 0.20 # Specific rate of mortality, (1/d) =0.3-0.6 (Savchuk, 2002), =0.05 (Gregoire, Lacroix, 2001)
    K_phy_exc: 0.10 # Specific rate of excretion, (1/d) =0.01 (Burchard et al., 2006)
# ---Het -----
    K_het_phy_gro: 1.1 #! Max.spec. rate of grazing of Zoo on Phy, (1/d), =0.9 (Gregoire, Lacroix, 2001), =1.5 (Burchard et al., 2006)
    K_het_phy_lim: 0.5 #! Half-sat.const.for grazing of Zoo on Phy for Phy/Zoo ratio
    K_het_pom_gro: 0.50 #! Max.spec.rate of grazing of Zoo on POP and bacteria, (1/d), =1.2 (Burchard et al., 2006)
    K_het_pom_lim: 0.05 #! Half-sat.const.for grazing of Zoo on POP for POP/Zoo ratio
    K_het_res: 0.02 #! Specific respiration rate =0.02 (Yakushev et al., 2007)
    K_het_mrt: 0.05 #! %! Maximum specific rate of mortality of Zoo (1/d) =0.05 (Gregoire, Lacroix, 2001)
    Uz: 0.5 #! Food absorbency for Zoo (nd) =0.5-0.7 (Savchuk, 2002)
    Hz: 0.5 #! Ratio betw. diss. and part. excretes of Zoo (nd), =0.5 (Gregoire, Lacroix, 2001)
    limGrazBac: 2. #! Limiting parameter for bacteria grazing by Zoo, =2. (Yakushev et al., 2007)
# ---N -----
    K_nox_lim: 0.1 #! Half-sat.const.for uptake of NO3+NO2 (uM) =0.5 (Gregoire, Lacroix, 2001)
    K_nh4_lim: 0.02 #! Half-sat.const.for uptake of NH4 (uM) =0.2 (Gregoire, Lacroix, 2001)
    K_psi: 1.46 #! Strength of NH4 inhibition of NO3 uptake constant (uM-1) =1.46_rk (Gregoire, Lacroix, 2001)
```

```

K_nfix: 0.4      #! Maximum specific rate of N-fixation (1/d) =0.5 (Savchuk, 2002)
#----P-----
K_po4_lim: 0.012  #! Half-sat. constant for uptake of PO4 by Phy
#----Si-----
K_si_lim: 0.1     #! Half-sat. constant for uptake of Si_lim by Phy
#----Sinking-----
Wsed: 5.0        #! Rate of sinking of detritus (m/d), =0.4 (Savchuk, 2002), =5. (Gregoire, Lacroix, 2001), =1-370 (Alldredge, Gotschalk, 1988)
Wphy: 0.2        #! Rate of sinking of Phy (m/d), =0.1-0.5 (Savchuk, 2002)
Whet: 1.         #! Rate of sinking of Het (m/d), =1. (Yakushev et al., 2007)
#---- Stoichiometric coefficients ----
r_n_p: 16.0      #! N[uM]/P[uM]
r_o_n: 6.625     #! O2[uM]/N[uM]
r_c_n: 8.0       #! C[uM]/N[uM]
r_si_n: 1.0     #! Si[uM]/N[uM]
coupling:
NO2: niva_brom_redox/NO2
H2S: niva_brom_redox/H2S
Baan: niva_brom_redox/Baan
Baae: niva_brom_redox/Baae
Bhae: niva_brom_redox/Bhae
Bhan: niva_brom_redox/Bhan
Si: niva_brom_redox/Si
Sipart: niva_brom_redox/Sipart
DIC: niva_brom_carb/DIC
Alk: niva_brom_carb/Alk
Hplus: niva_brom_carb/Hplus
Kp1: niva_brom_eqconst/Kp1
Kp2: niva_brom_eqconst/Kp2
Kp3: niva_brom_eqconst/Kp3
Knh4: niva_brom_eqconst/Knh4
KSi: niva_brom_eqconst/KSi
#-----
niva_brom_redox:
initialization:
Mn2: 0.0
Mn3: 0.0
Mn4: 0.0
MnS: 0.0
MnCO3: 0.0
Fe2: 0.0
Fe3: 0.0
FeS: 0.0
FeCO3: 0.0
NO2: 0.0
Si: 0.0
Sipart: 0.0
H2S: 0.0
S0: 0.0
S2O3: 0.0
SO4: 25000.
Baae: 0.01
Bhae: 0.01
Baan: 0.01
Bhan: 0.01
CaCO3: 5.0
CH4: 0.001
FeS2: 0.0
parameters:
#---- Model parameters -----
Wbact: 0.4       #! Rate of sinking of bacteria (Bhae,Baae,Bhan,Baan) (1/d), (Yakushev et al.,2007)
Wm: 7.0         #! Rate of accelerated sinking of particles with settled metal hydroxides (1/d), (Yakushev et al.,2007)
# specific rates of biogeochemical processes
#---- Mn-----
K_mn_ox1: 0.1    #! Specific rate of oxidation of Mn2 to Mn3 with O2 (1/d).
K_mn_ox2: 0.2    #! Specific rate of oxidation of Mn3 to Mn4 with O2 (1/d)
K_mn_rd1: 0.5    #! Specific rate of reduction of Mn4 to Mn3 with H2S (1/d)
K_mn_rd2: 1.0    #! Specific rate of reduction of Mn3 to Mn2 with H2S (1/d)
K_mns: 1500.     #! Conditional equilibrium constant for MnS from Mn2 with H2S (M)
K_mns_diss: 0.0005 #! Specific rate of dissolution of MnS to Mn2 and H2S (1/d)
K_mns_form: 0.00001 #! Specific rate of formation of MnS from Mn2 with H2S (1/d)
K_mnco3: 1.      #! Conditional equilibrium constant % 1.8e-11 (M) (Internet) 1 uM2 for Mn2+CO3->MnCO3 (Meysman,2003)
K_mnco3_diss: 7.e-7 #! Specific rate of dissolution of MnCO3 (1/d) =6.8e-7 (2.5 X 10-1 yr-1 (Van Cappellen, Wang, 1996) !1x10-4 yr-1) (Hunter et al, 98)
K_mnco3_form: 0.1e-4 #! Specific rate of formation of MnCO3 (1/d) =2.7e-7 (1. X 10-4 yr-1 (Van Cappellen, Wang, 1996)!1x10-4 yr-1) (Hunter et al, 98)
K_mnco3_ox: 0.0027 #! Specific rate of oxidation of MnCO3 with O2 (1/d)=0.0027 ( 1x10^(-6) M/yr (Van Cappellen, Wang, 1996).

```



K\_DON\_mn: 0.001 #! Specific rate of oxidation of DON with Mn4 (1/d)  
 K\_PON\_mn: 0.001 #! Specific rate of oxidation of PON with Mn4 (1/d)  
 s\_mnox\_mn2: 0.01 #! threshold of Mn2 oxidation (uM Mn) (Yakushev et al.,2007)  
 s\_mnox\_mn3: 0.01 #! threshold of Mn3 oxidation (uM Mn) (Yakushev et al.,2007)  
 s\_mnrd\_mn4: 0.01 #! threshold of Mn4 reducion (uM Mn) (Yakushev et al.,2007)  
 s\_mnrd\_mn3: 0.01 #! threshold of Mn3 reducion (uM Mn) (Yakushev et al.,2007)

#--- Fe-----  
 K\_fe\_ox1: 0.5 #!Specific rate of oxidation of Fe2 to Fe3 with O2 (1/d), =4. (Kononov et al., 2006)  
 K\_fe\_ox2: 0.001 #!0.1! Specific rate of oxidation of Fe2 to Fe3 with MnO2 (1/d)=0.74 (Kononov et al., 2006); 3x10<sup>6</sup> 1/(M yr) is estimated in Van Cappellen-Wang-96  
 K\_fe\_rd: 1.2 #!0.5! Specific rate of reduction of Fe3 to Fe2 with H2S (1/day) \*=0.05 (Kononov et al., 2006)  
 K\_fes: 2510.0 #!FeS equilibrium constant (Solubility Product Constant) (uM)=2510 ( 2.51x10<sup>-6</sup> mol cm<sup>-3</sup>, Bektursuniva,11)  
 K\_fes\_form: 5.e-4 #!Specific rate of precipitation of FeS from Fe2 with H2S (1/day)=1.e-5 (4x10<sup>-3</sup> 1/yr, Bektursunova,11)  
 K\_fes\_diss: 1.e-6 #!Specific rate of dissollution of FeS to Fe2 and H2S (1/day)=3.e-6 (1x10<sup>-3</sup> 1/yr, Bektursunova,11)  
 K\_fes\_ox: 0.001 #!Specific rate of oxidation of FeS with O2 (1/day)=0.001(3x10<sup>5</sup> 1/(M yr),(Van Cappellen, Wang, 1996)  
 K\_DON\_fe: 0.00005 #!-0.0003! % Specific rate of oxidation of DON with Fe3 (1/day)  
 K\_PON\_fe: 0.00001 #!-0.0001! % Specific rate of oxidation of PON with Fe3 (1/day)  
 K\_fes2\_form: 1.e-6 #!specific rate of FeS2 formation by FeS oxidation by H2S (1/day)=0.000009 (10<sup>-4</sup>) L/mol/s (Rickard-97)  
 K\_fes2\_ox: 4.38e-4 #!specific rate of pyrite oxidation by O2 (1/uM/d)=4.38x10<sup>-4</sup> 1/micromolar/day (Wijsman et al -2002).  
 s\_feox\_fe2: 0.001 #!threshold of Fe2 reducion  
 s\_ferd\_fe3: 0.01 #!threshold of Fe3 reducion (uM Fe)  
 K\_feco3: 15. #!10. 12.e-2! Conditional equilibrium constant % 1.8e-11 (M) (Internet) 1 uM2 for Mn2+CO3->FeCO3 (Meysman,2003)  
 K\_feco3\_diss: 7.e-4 #!Specific rate of dissolution of FeCO3 (1/day)=6.8e-7 12.5 X 10<sup>-1</sup> yr-1 (Van Cappellen, Wang, 1996) 1!x10<sup>-4</sup> yr-1 (Hunter et al, 98)  
 K\_feco3\_form: 3.e-4 #!Specific rate of formation of FeCO3 (1/day)=2.7e-7 1! X 10<sup>-4</sup> yr-1(Van Cappellen, Wang, 1996)!1x10<sup>-4</sup> yr-1 (Hunter et al, 98)  
 K\_feco3\_ox: 0.0027 #!Specific rate of oxidation of FeCO3 with O2 (1/day)=0.0027 ( 1x10<sup>-6</sup>) M/yr (Van Cappellen, Wang, 1996).

#--- S-----  
 K\_hs\_ox: 0.5 #! Specific rate of oxidation of H2S to S0 with O2 (1/d), =0.1 (Gregoire, Lacroix, 2001)  
 K\_s0\_ox: 0.02 #! 0.02 Specific rate of oxidation of S0 with O2 (1/d), (Yakushev, Neretin,1997)  
 K\_s2o3\_ox: 0.01 #! Specific rate of oxidation of S2O3 with O2 (1/d), (Yakushev, Neretin,1997)  
 K\_so4\_rd: 5.e-6 #! Specific rate of OM sulfate reduction with sulfate (1/d), (Yakushev, Neretin,1997)  
 K\_s2o3\_rd: 0.001 #! Specific rate of OM sulfate reduction with thiosulfate (1/d) (Yakushev, Neretin,1997)  
 K\_s0\_disp: 0.001 #! Specific rate of S0 dispropotionation (1/d) (Yakushev,2013)  
 K\_s0\_no3: 0.9 #! Specific rate of oxidation of S0 with NO3 (1/d) (Yakushev,2013)  
 K\_s2o3\_no3: 0.01 #! Specific rate of oxidation of S2O3 with NO3 (1/d) (Yakushev,2013)  
 K\_mnrd\_hs: 1.0 #! half sat. of Mn reduction (uM S) (Yakushev,2013)  
 K\_ferd\_hs: 1.0 #! half sat. of Fe reduction (uM S) (Yakushev,2013)

#--- N-----!  
 K\_DON\_ox: 0.05 #! Specific rate of oxidation of DON with O2 (1/d) = 0.1(Savchuk, 2002)  
 K\_PON\_ox: 0.002 #! Specific rate of oxidation of PON with O2 (1/d) =0.002 (Savchuk, 2002), =0.07 (Gregoire, Lacroix, 2001)  
 Tda: 13.0 #! Temperature control coefficient for OM decay (Burchard et al., 2006)  
 beta\_da: 20.0 #! Temperature control coefficient for OM decay (Burchard et al., 2006)  
 K\_omox\_o2: 1.0 #! Half sat. of o2 for OM mineralization (uM) (Yakushev,2013)  
 K\_PON\_DON: 0.1 #! Specific rate of Autolysis of PON to DON (1/d), =0.02 (Burchard et al., 2006)  
 K\_nitrif1: 0.01 #! Spec.rate of 1st st. of nitrification, (1/d), =0.01 (Yakushev,2013) =0.1(Savchuk, 2002) =0.1 (Gregoire, Lacroix, 2001)  
 K\_nitrif2: 0.1 #! Spec.rate of 2d st. of nitrification, (1/d), =0.1 (Yakushev,2013)  
 K\_denitr1: 0.16 #! Spec.rate of 1 stage of denitrif =0.16 (Yakushev, Neretin,1997), = 0.5(Savchuk, 2002), = 0.015(Gregoire, Lacroix, 2001)  
 K\_denitr2: 0.25 #! Spec.rate of 2 stage of denitrif =0.22 (Yakushev, Neretin,1997)  
 K\_omno\_no3: 0.001 #! Half sat. of no3 for OM denitr. (uM N) (Yakushev,2013)  
 K\_omno\_no2: 0.001 #! Half sat. of no2 for OM denitr. (uM N) (Yakushev,2013)  
 K\_hs\_no3: 0.8 #! Spec.rate of thiodenitrification (1/d), =0.15 (Gregoire, Lacroix, 2001)  
 K\_annamox: 0.8 #! Spec.rate of Anammox (1/d), (Gregoire, Lacroix, 2001)

#--- O2-----!  
 O2s\_nf: 5. #! threshold of O2 saturation for nitrification, (uM), =10. (Gregoire, Lacroix, 2001)  
 O2s\_dn: 10.0 #! threshold of O2 for denitrification, anammox, Mn reduction (uM O2), =40 (0.72 mgO2/l) (Savchuk, 2002)  
 s\_omox\_o2: 0.01 #! threshold of o2 for OM mineralization (uM O2) (Yakushev,2013)  
 s\_omno\_o2: 25.0 #! threshold of o2 for OM denitrification (uM O2) (Yakushev,2013)  
 s\_omso\_o2: 25.0 #! threshold of o2 for OM sulfate reduction (uM O2) (Yakushev,2013)  
 s\_omso\_no3: 5.0 #! threshold of noX for OM sulfate reduction (uM O2) (Yakushev,2013)  
 K\_mnox\_o2: 2.0 #! half sat. of Mn oxidation (uM O2) (Yakushev,2013)

#--- C-----!  
 K\_caco3\_diss: 3.0 #! CaCO3 dissollution rate constant (1/d) (wide ranges are given in (Luff et al., 2001))  
 K\_caco3\_form: 0.0002 #! CaCO3 precipitation rate constant (1/d) (wide ranges are given in (Luff et al., 2001))  
 K\_DON\_ch4: 0.00014 #! Specific rate of methane production from DON (1/d) (Lopes et al., 2011)  
 K\_PON\_ch4: 0.00014 #! Specific rate of methane production from PON (1/d) (Lopes et al., 2011)  
 K\_ch4\_o2: 0.14 #! Specific rate of oxidation of CH4 with O2 (1/d) =0.14 (Lopes et al., 2011)  
 K\_ch4\_so4: 0.0000274 #! Specific rate of oxidation of CH4 with SO4 (1/uM/day) (0.0274 m3 /mol-1 day-1 Lopes et al., 2011)  
 s\_omch\_so4: 30. #! threshold of of SO4 for methane production from OM (uM) (Lopes et al., 2011)

#--- Si-----!  
 K\_sipart\_diss: 0.080 #! Si dissollution rate constant (1/d), =0.008 (Popova, Srokosz, 2009)

#--- Bacteria-!  
 K\_Baae\_gro: 0.1 #! Baae maximum specific growth rate (1/d) (Yakushev, 2013)  
 K\_Baae\_mrt: 0.005 #! Baae specific rate of mortality (1/d) (Yakushev et al., 2013)  
 K\_Baae\_mrt\_h2s: 0.899 #! Baae increased specific rate of mortality due to H2S (1/d) (Yakushev et al., 2013)  
 limBaae: 2.0 #! Limiting parameter for nutrient consumption by Baae (nd) (Yakushev, 2013)

K\_Bhae\_gro: 0.5 #! Bhae maximum specific growth rate (1/d) (Yakushev, 2013)  
K\_Bhae\_mrt: 0.01 #! Bhae specific rate of mortality (1/d) (Yakushev, 2013)  
K\_Bhae\_mrt\_h2s: 0.799 #! Bhae increased specific rate of mortality due to H2S (1/d) (Yakushev, 2013)  
limBhae: 5.0 #! Limiting parameter for OM consumption by Bhae (nd) (Yakushev, 2013)  
K\_Baan\_gro: 0.2 #! Baan maximum specific growth rate (1/d) (Yakushev, 2013)  
K\_Baan\_mrt: 0.005 #! Baan specific rate of mortality (1/d) (Yakushev, 2013)  
limBaan: 2.0 #! Limiting parameter for nutrient consumption by Baan (nd) (Yakushev, 2013)  
K\_Bhan\_gro: 0.15 #! Bhan maximum specific growth rate (1/d) (Yakushev, 2013)  
K\_Bhan\_mrt: 0.01 #! Bhan specific rate of mortality (1/d) (Yakushev, 2013)  
K\_Bhan\_mrt\_o2: 0.899 #! Bhan increased specific rate of mortality due to O2 (1/d) (Yakushev, 2013)  
limBhan: 2.0 #! Limiting parameter for OM consumption by Bhan (nd) (Yakushev, 2013)

#---- Stoichiometric coefficients ----!

r\_fe\_n: 26.5 #! Fe[uM]/N[uM] (Boudreau, 1996)  
r\_mn\_n: 13.25 #! Mn[uM]/N[uM] (Boudreau, 1996)  
f: 0.66 #! conversion factor relating solid and dissolved species concentrations  
r\_fe3\_p: 2.7 #! Fe[uM]/P[uM] partitioning coeff. for Fe oxide (Yakushev et al., 2007)  
r\_mn3\_p: 0.67 #! Mn[uM]/P[uM] complex stoichiometric coeff. for Mn(III) (Yakushev et al., 2007)  
r\_fe3\_si: 3. #! Fe[uM]/Si[uM] partitioning coeff. for Fe oxide

coupling:

O2: niva\_brom\_bio/O2 # O2: niva\_oxydep/oxy  
NH4: niva\_brom\_bio/NH4  
NO3: niva\_brom\_bio/NO3  
PO4: niva\_brom\_bio/PO4  
PON: niva\_brom\_bio/PON  
DON: niva\_brom\_bio/DON  
Wsed: niva\_brom\_bio/Wsed  
Kp1: niva\_brom\_eqconst/Kp1  
Kp2: niva\_brom\_eqconst/Kp2  
Kp3: niva\_brom\_eqconst/Kp3  
Knh4: niva\_brom\_eqconst/Knh4  
Kh2s: niva\_brom\_eqconst/Kh2s  
KSi: niva\_brom\_eqconst/KSi  
Kc0: niva\_brom\_eqconst/Kc0  
Alk: niva\_brom\_carb/Alk  
DIC: niva\_brom\_carb/DIC  
Hplus: niva\_brom\_carb/Hplus  
Om\_Ca: niva\_brom\_carb/Om\_Ca  
Om\_Ar: niva\_brom\_carb/Om\_Ar  
CO3: niva\_brom\_carb/CO3  
pCO2: niva\_brom\_carb/pCO2  
Ca: niva\_brom\_carb/Ca

# REFERENCES:

- # Alldredge, A.L. and Gotschalk, C., 1988. In situ settling behavior of marine snow. *Limnology and Oceanography*, 33(3), pp.339-351.  
# Boudreau, B. P.: A method-of-lines code for carbon and nutrient diagenesis in aquatic sediments, *Comput. Geosci.*, 22(5), 479–496, doi:10.1016/0098-3004(95)00115-8, 1996.  
# Burchard H., Bolding K., Kühn W., Meister A., Neumann T. and Umlauf L., 2006. Description of a flexible and extendable physical–biogeochemical model system for the water column. *Journal of Marine Systems*, 61(3), 180-211.  
# Dickson AG. 1990. Thermodynamics of the dissociation of boric acid in synthetic seawater from 273.15 to 318.15 K. *Deep-Sea Research Part a-Oceanographic Research Papers*. 37:755-766  
# Dickson, A.G., Sabine, C.L. and Christian, J.R., 2007. *Guide to Best Practices for Ocean CO2 Measurements*.  
# DOE (1994) *Handbook of methods for the analysis of the various parameters of the carbon dioxide system in sea water*; version 2, A. G. Dickson & C. Goyet, eds., ORNL/CDIAC-74.  
# Gregoire M. and Lacroix G., 2001. Study of the oxygen budget of the Black Sea waters using a 3D coupled hydrodynamical–biogeochemical model. *Journal of marine systems*, 31(1), pp.175-202.  
# Kononov, S.K., Murray, J.W., Luther, G.W., Tebo, B.M., 2006. Processes controlling the Redox budget for oxic/anoxic water column of the Black Sea. *Deep Sea Research (II)* 53: 1817-1841.  
# Link JS, Griswold CA, Methratta ET, Gunnard J, Editors. 2006. *Documentation for the Energy Modeling and Analysis eXercise (EMAX)*. US Dep. Commer., Northeast Fish. Sci. Cent. Ref. Doc. 06-15; 166 p.  
# Millero FJ, 1995 Thermodynamics of the carbon dioxide system in the oceans. *Geochimica et Cosmochimica Acta* 59 (4), 661-677  
# Luff R., Haeckel M., and Wallmann K. 2001. Robust and fast FORTRAN and MATLAB libraries to calculate pH distributions in marine systems, *Comput. Geosci.*, 27, 157–169  
# Popova EE, Srokosz MA. 2009. Modelling the ecosystem dynamics at the Iceland-Faeroes Front: Biophysical interactions, *J. Mar. Syst.*, 77(1-2), 182–196, doi:10.1016/j.jmarsys.2008.12.005, 2009.  
# Savchuk O. 2002. Nutrient biogeochemical cycles in the Gulf of Riga: scaling up field studies with a mathematical model. *J. Mar. Syst.* 32: 253-280.  
# Volkov II. 1984. *Geokhimiya Sery v Osadkakh Okeana (Geochemistry of Sulfur in Ocean Sedi-ments)*, Nauka, Moscow, USSR.  
# Van Cappellen P., Wang, Y. F. 1996: Cycling of iron and manganese in surface sediments: A general theory for the coupled transport and reaction of carbon, oxygen, nitrogen, sulfur, iron, and manganese, *Am. J. Sci.*, 296(3), 197–243, doi:10.2475/ajs.296.3.197, 1996.  
# Weiss RF. 1974 Carbon dioxide in water and seawater: the solubility of a non-ideal gas. *Marine Chemistry* 2:203-215.  
# Yakushev E., Neretin L., 1997. One-dimensional modelling of nitrogen and sulphur cycles in the aphotic zones of the Black Sea and Arabian Sea. *Global Biogeochem. Cycles* 11 Ž3,401–414.  
# Yakushev EV, Pollehn F., Jost G., Kuznetsov I., Schneider B., Umlauf L. 2007. Analysis of the water column oxic/anoxic interface in the Black and Baltic seas with a numerical model, *Mar. Chem.*, 107(3), 388–410.

# Yakushev E. 2013. RedOx Layer Model: A Tool for Analysis of the Water Column Oxic/Anoxic Interface Processes. In: E.V.Yakushev (ed.) Chemical Structure of Pelagic Redox Interfaces: Observation and Modeling, Hdb Env Chem (2013) 22: 203–234, DOI 10.1007/698\_2012\_145, Springer-Verlag Berlin Heidelberg
